# Supplementary material for: Reference Gene Selection and Validation for the Early Responses to Downy Mildew Infection in Susceptible and Resistant Vitis vinifera Cultivars
Source: PubMed Central journal article supplement (PMC3762845; doi:10.1371/journal.pone.0072998), 2013-09-04

(A) UBQ

Melt Curve

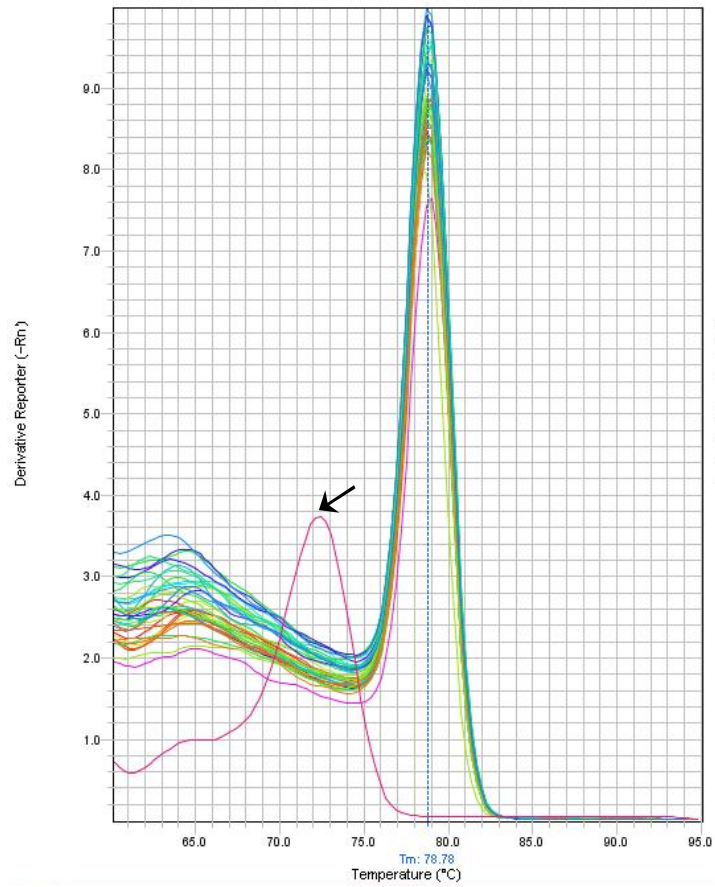

(B) SAND

Melt Curve

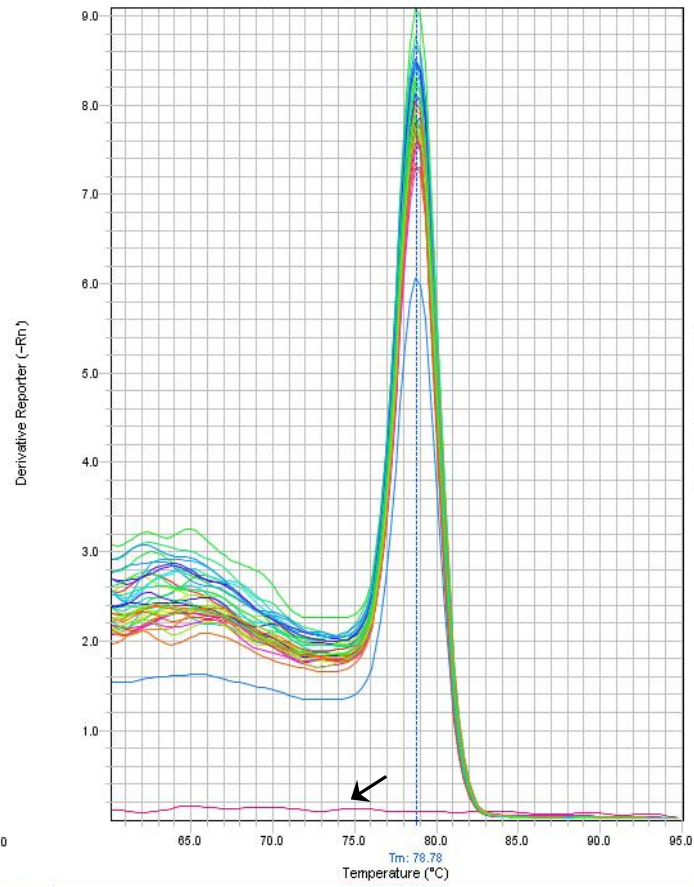

(C) ACT

Melt Curve

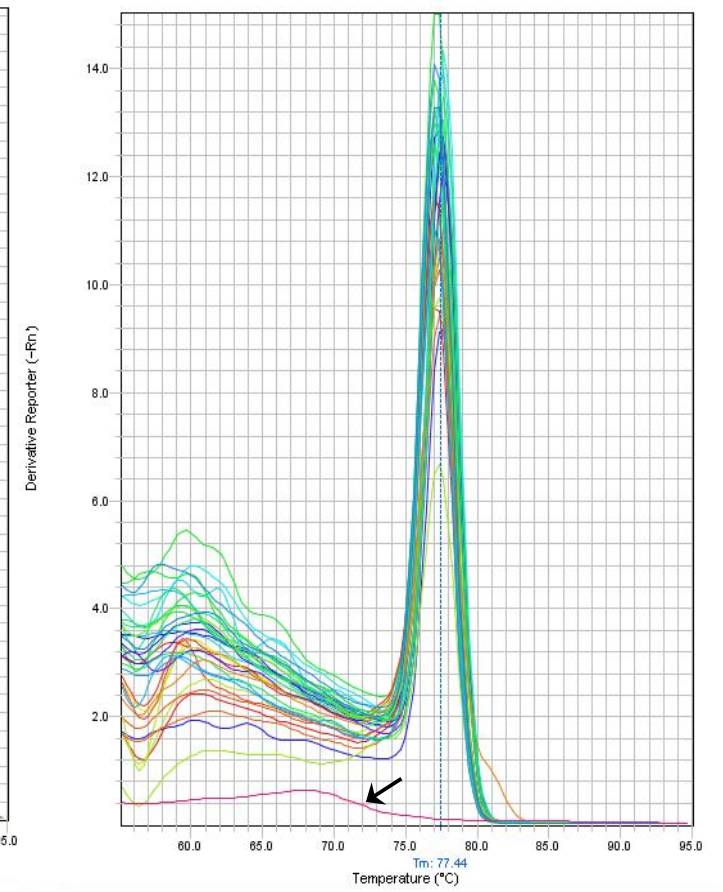

**(D) VATP16**

**Melt Curve**

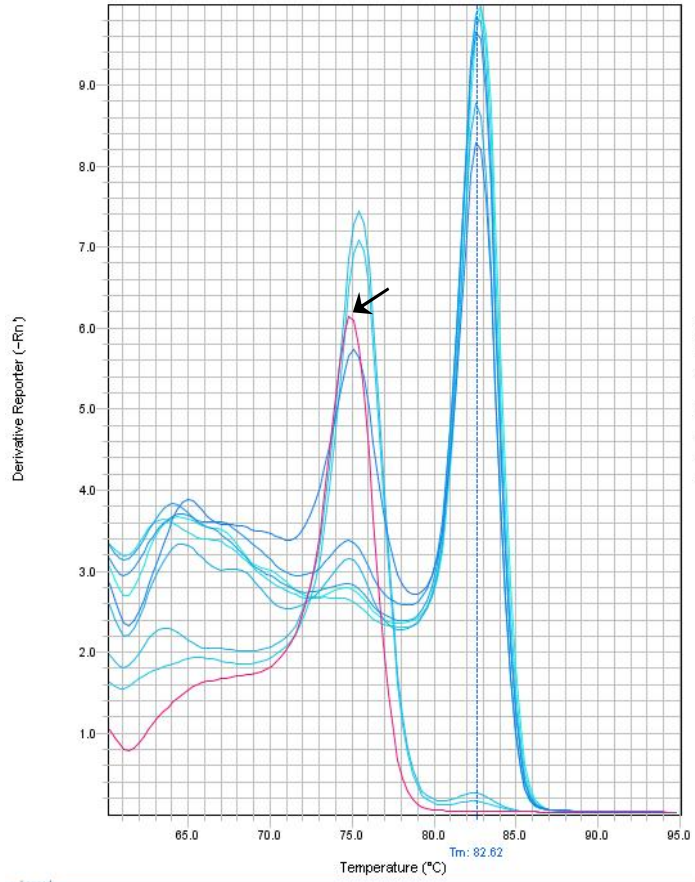

**(E) PTB2**

**Melt Curve**

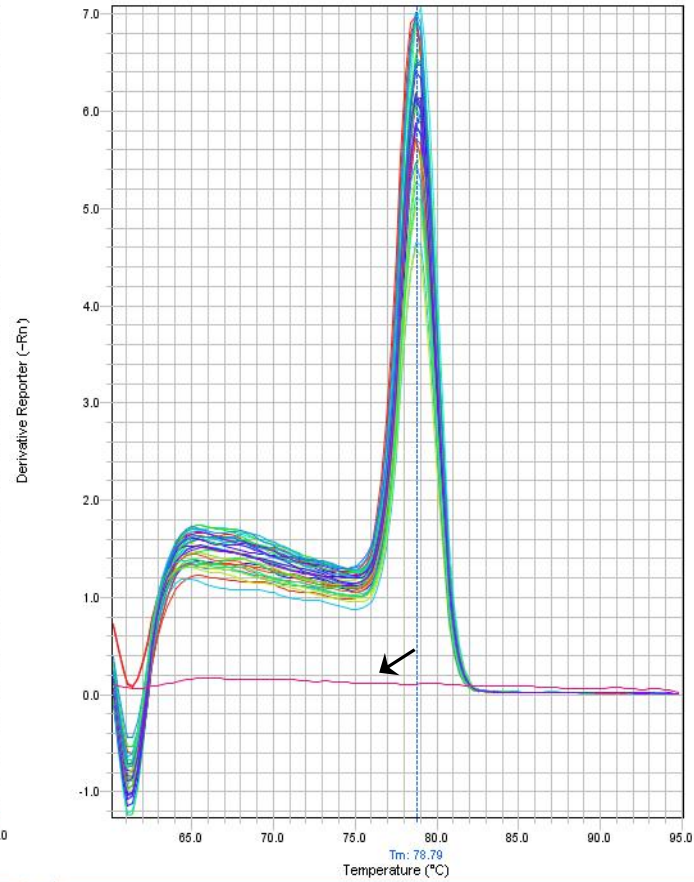

**(F) PsaB**

**Melt Curve**

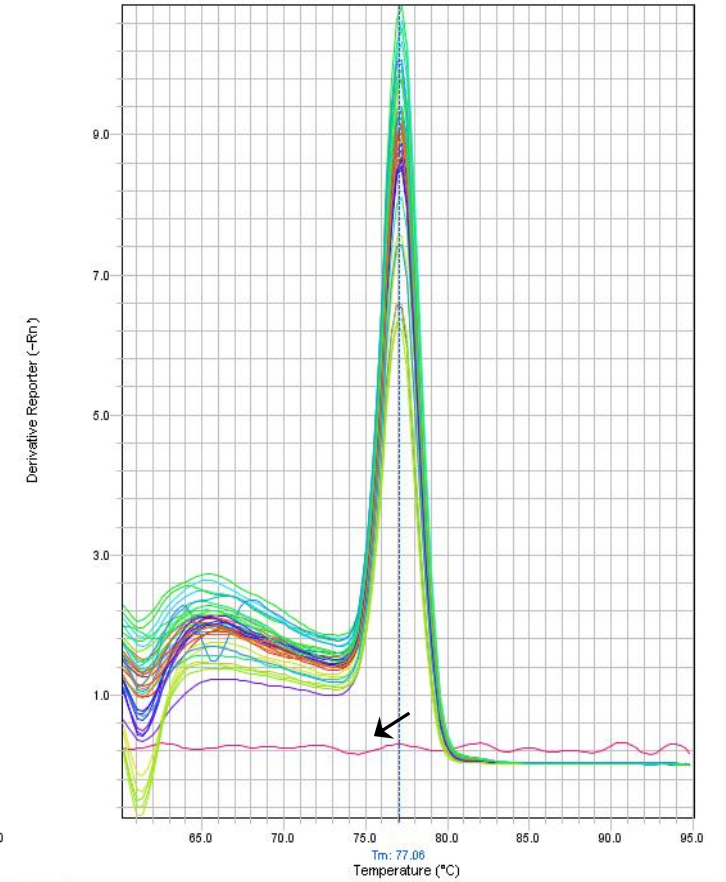

(G) SMD3

Melt Curve

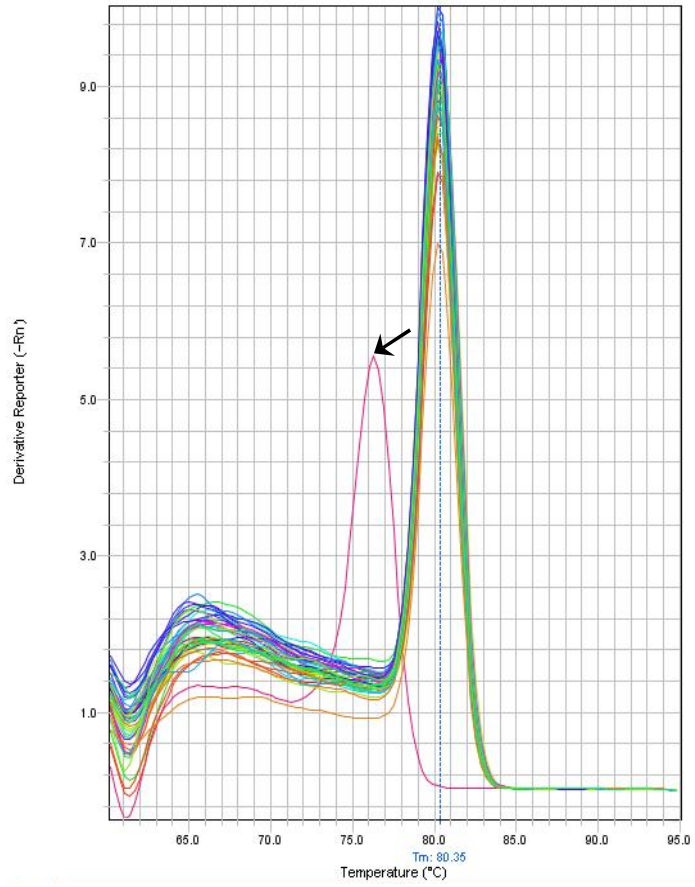

(H) EF1 $\alpha$

Melt Curve

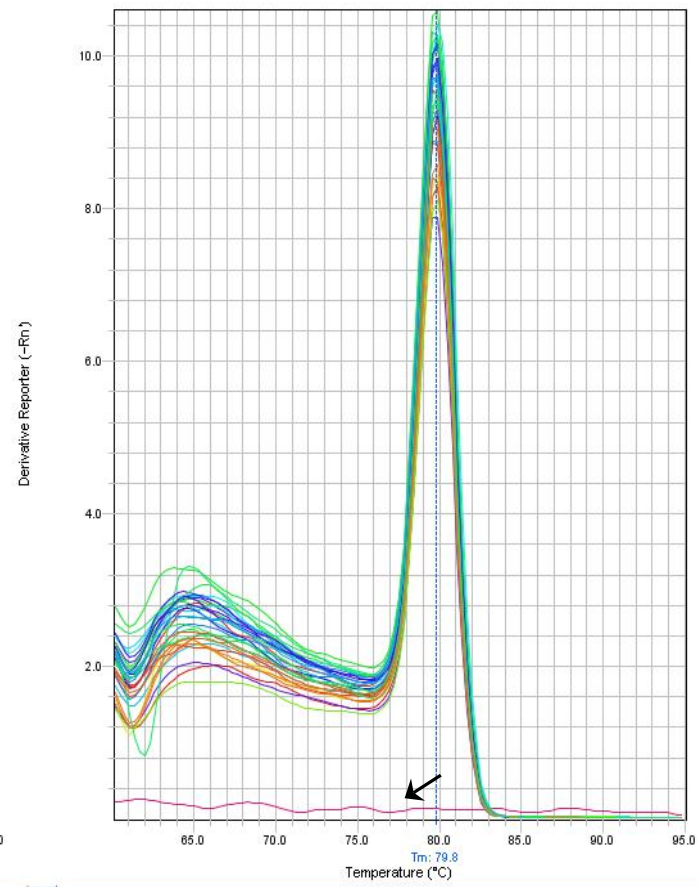

(I) 60S

Melt Curve

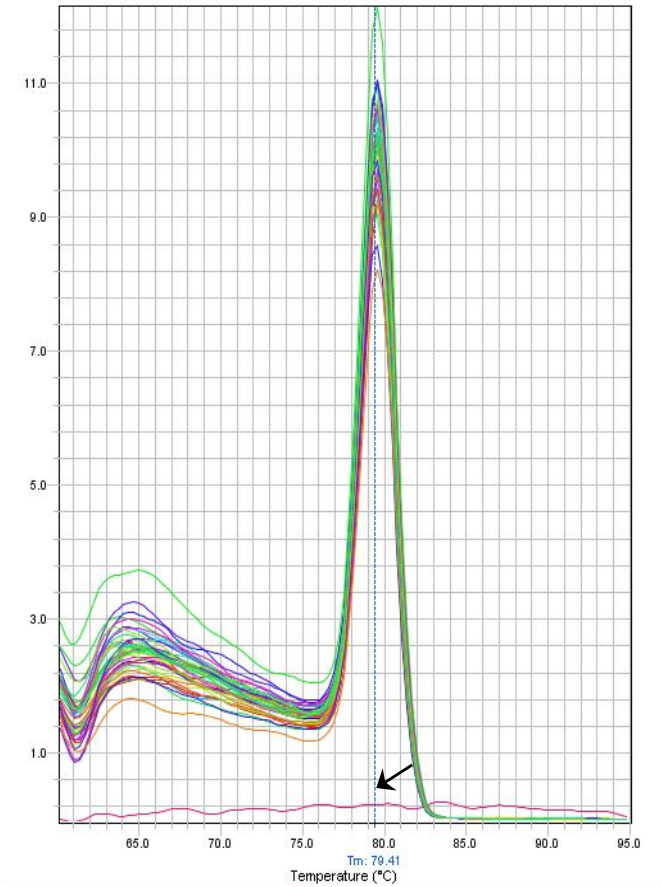

### (J) GAPDH

#### Melt Curve

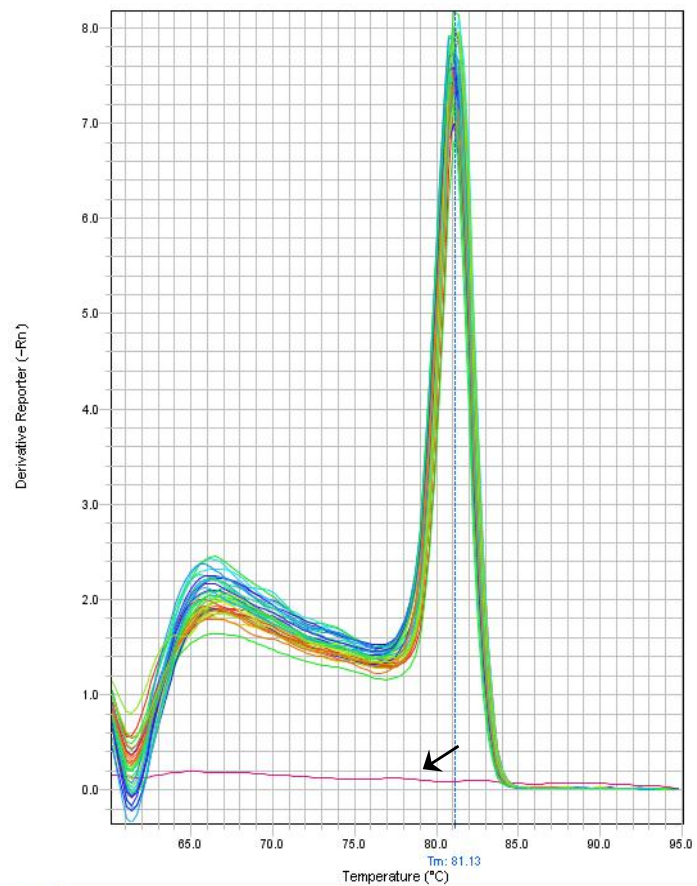

### (K) UQCC

#### Melt Curve

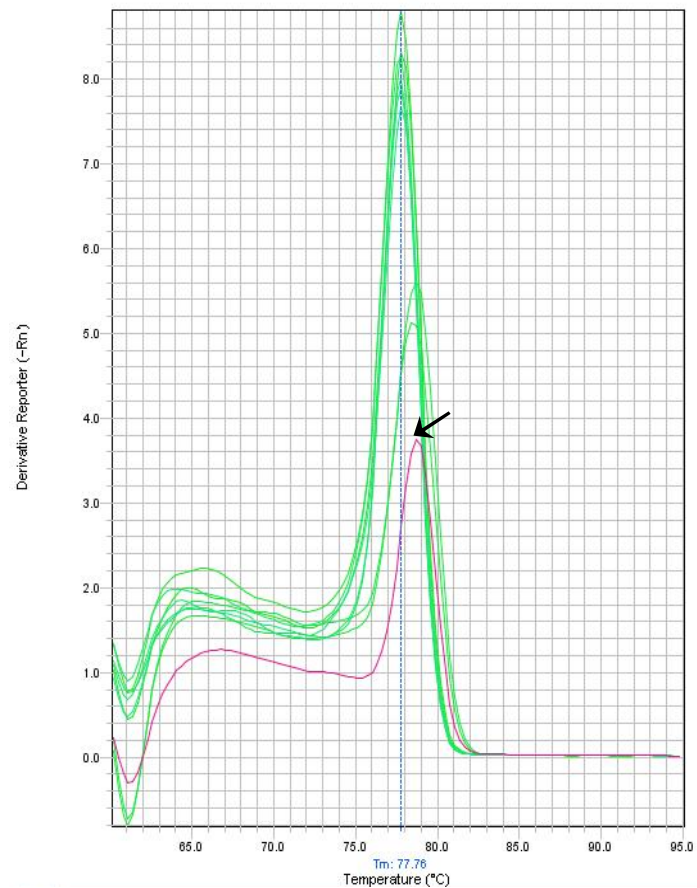

Supplement: pone.0072998.s001.pdf [file pone.0072998.s001.pdf]
