# Supplementary material for: Reference Gene Selection and Validation for the Early Responses to Downy Mildew Infection in Susceptible and Resistant Vitis vinifera Cultivars
Source: PubMed Central journal article supplement (PMC3762845; doi:10.1371/journal.pone.0072998), 2013-09-04
Supplement: pone.0072998.s004.pdf [file pone.0072998.s004.pdf]

**- Descriptive statistics of reference gene data in genotype subsets (0h, 6, 12, 18 and 24 hpi Trincadeira and Regent) based on the BestKeeper approach**

|                     | <b>UBQ</b> | <b>SMD3</b> | <b>SAND</b> | <b>PsaB</b> | <b>GAPDH</b> | <b>EF1<math>\alpha</math></b> | <b>ACT</b> | <b>60S</b> |
|---------------------|------------|-------------|-------------|-------------|--------------|-------------------------------|------------|------------|
| n                   | 25         | 25          | 25          | 25          | 25           | 25                            | 25         | 25         |
| GM [CP]             | 18.21      | 22.17       | 23.32       | 15.46       | 16.45        | 17.02                         | 20.57      | 20.14      |
| AM [CP]             | 18.23      | 22.19       | 23.37       | 15.54       | 16.47        | 17.06                         | 20.59      | 20.18      |
| min [CP]            | 16.03      | 20.25       | 20.29       | 12.44       | 15.00        | 14.38                         | 18.98      | 18.20      |
| max [CP]            | 19.82      | 24.46       | 26.08       | 18.36       | 18.13        | 18.85                         | 22.97      | 22.73      |
| SD [ $\pm$ CP]      | 0.77       | 0.66        | 1.19        | 1.11        | 0.59         | 0.93                          | 0.85       | 1.03       |
| CV [% CP]           | 4.23       | 2.98        | 5.10        | 7.16        | 3.60         | 5.43                          | 4.12       | 5.11       |
| coeff. of corr. [r] | 0.900      | 0.560       | 0.854       | 0.569       | 0.744        | 0.884                         | 0.563      | 0.900      |
| <i>p</i> value      | 0.001      | 0.004       | 0.001       | 0.003       | 0.001        | 0.001                         | 0.003      | 0.001      |

n. number of cDNA samples; GM. geometric mean of Cq value; AM. arithmetic mean of Cq value; min and max. extreme values of Cq; SD [ $\pm$  CP]. standard deviation of Cq value; CV [% CP]. coefficient of variance expressed as percentage of Cq value; r. Pearson coefficient of correlation; *p* value. *p* value associated with the Pearson coefficient of correlation.

**- Descriptive statistics of reference gene data in inoculated (6, 12, 18, 24 hpi) and mock inoculated Trincadeira based on the BestKeeper approach**

|                     | <b>UBQ</b> | <b>SMD3</b> | <b>SAND</b> | <b>PsaB</b> | <b>GAPDH</b> | <b>EF1<math>\alpha</math></b> | <b>ACT</b> | <b>60S</b> |
|---------------------|------------|-------------|-------------|-------------|--------------|-------------------------------|------------|------------|
| n                   | 23         | 23          | 23          | 23          | 23           | 23                            | 23         | 23         |
| GM [CP]             | 18.88      | 22.59       | 23.84       | 15.40       | 16.58        | 17.33                         | 21.13      | 19.93      |
| AM [CP]             | 18.92      | 22.61       | 23.86       | 15.50       | 16.61        | 17.37                         | 21.16      | 19.97      |
| min [CP]            | 17.21      | 21.33       | 21.67       | 12.67       | 14.71        | 15.16                         | 19.37      | 18.16      |
| max [CP]            | 21.40      | 24.46       | 25.46       | 19.62       | 19.48        | 18.85                         | 23.60      | 22.85      |
| SD [ $\pm$ CP]      | 1.00       | 0.66        | 0.92        | 1.41        | 0.84         | 0.86                          | 0.92       | 1.09       |
| CV [% CP]           | 5.31       | 2.92        | 3.85        | 9.06        | 5.08         | 4.98                          | 4.37       | 5.48       |
| coeff. of corr. [r] | 0.575      | 0.759       | 0.744       | 0.741       | 0.814        | 0.873                         | 0.746      | 0.249      |
| <i>p</i> value      | 0.001      | 0.001       | 0.001       | 0.001       | 0.001        | 0.001                         | 0.001      | 0.251      |

n. number of cDNA samples; GM. geometric mean of Cq value; AM. arithmetic mean of Cq value; min and max. extreme values of Cq; SD [ $\pm$  CP]. standard deviation of Cq value; CV [% CP]. coefficient of variance expressed as percentage of Cq value; r. Pearson coefficient of correlation; *p* value. *p* value associated with the Pearson coefficient of correlation.

**- Descriptive statistics of reference gene data in inoculated (6, 12, 18, 24 hpi) and mock inoculated Regent based on the BestKeeper approach**

|                     | <b>UBQ</b> | <b>SMD3</b> | <b>SAND</b> | <b>PsaB</b> | <b>GAPDH</b> | <b>EF1<math>\alpha</math></b> | <b>ACT</b> | <b>60S</b> |
|---------------------|------------|-------------|-------------|-------------|--------------|-------------------------------|------------|------------|
| n                   | 23         | 23          | 23          | 23          | 23           | 23                            | 23         | 23         |
| GM [CP]             | 18.62      | 21.53       | 23.54       | 15.14       | 16.68        | 17.04                         | 20.85      | 19.66      |
| AM [CP]             | 18.65      | 21.54       | 23.59       | 15.18       | 16.70        | 17.08                         | 20.89      | 19.70      |
| min [CP]            | 16.03      | 20.25       | 20.29       | 12.44       | 15.00        | 14.38                         | 18.98      | 18.18      |
| max [CP]            | 20.67      | 22.92       | 26.08       | 18.04       | 18.38        | 19.47                         | 23.88      | 22.73      |
| SD [ $\pm$ CP]      | 0.92       | 0.53        | 1.13        | 0.87        | 0.66         | 0.87                          | 1.01       | 1.03       |
| CV [% CP]           | 4.92       | 2.44        | 4.80        | 5.70        | 3.93         | 5.09                          | 4.83       | 5.22       |
| coeff. of corr. [r] | 0.729      | 0.497       | 0.760       | 0.361       | 0.816        | 0.906                         | 0.662      | 0.232      |
| <i>p</i> value      | 0.001      | 0.022       | 0.001       | 0.107       | 0.001        | 0.001                         | 0.001      | 0.311      |

n. number of cDNA samples; GM. geometric mean of Cq value; AM. arithmetic mean of Cq value; min and max. extreme values of Cq; SD [ $\pm$  CP]. standard deviation of Cq value; CV [% CP]. coefficient of variance expressed as percentage of Cq value; r. Pearson coefficient of correlation; *p* value. *p* value associated with the Pearson coefficient of correlation.
